# Supplementary material for: Umbelliprenin and lariciresinol isolated from a long-term-used herb medicine Ferula sinkiangensis induce apoptosis and G0/G1 arresting in gastric cancer cells
Source: Royal Society of Chemistry journal article supplement (doi:10.1039/c5ra11335k), 2015-01-01

## Supplemental Information

The chromatographic profiles of Umbelliprenin and Lariciresinol analyzed by high performance liquid chromatography (HPLC)

The percentage of peak area for UM is 99.16% (**Supp. 1**), while the percentage of peak area for LA is 98.36% (**Supp. 2**), relatively

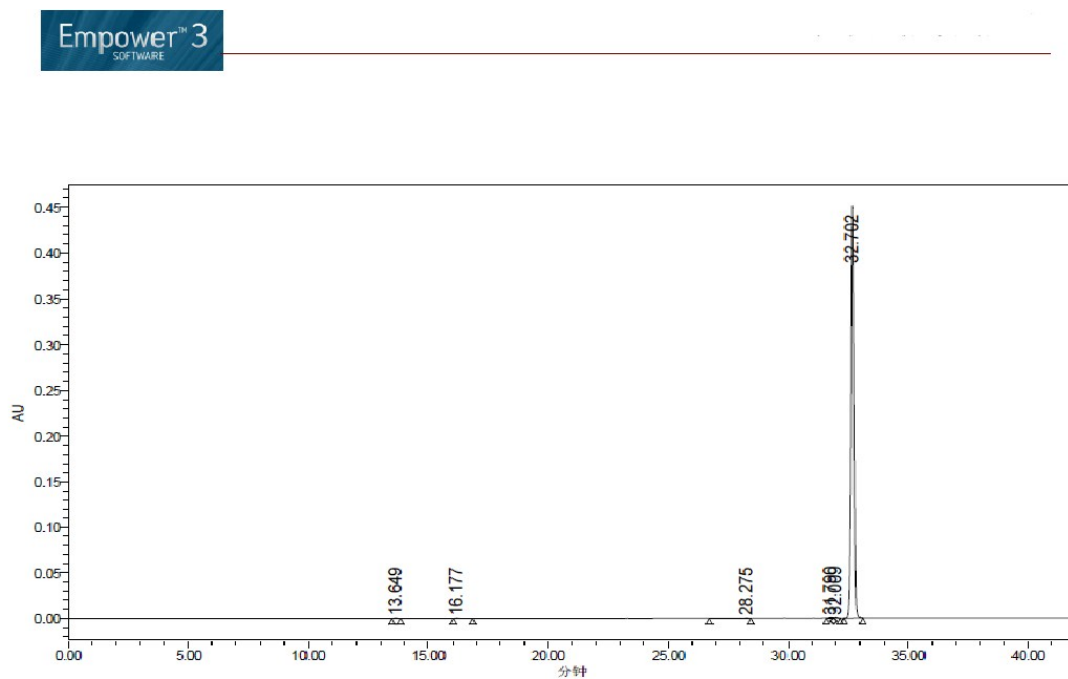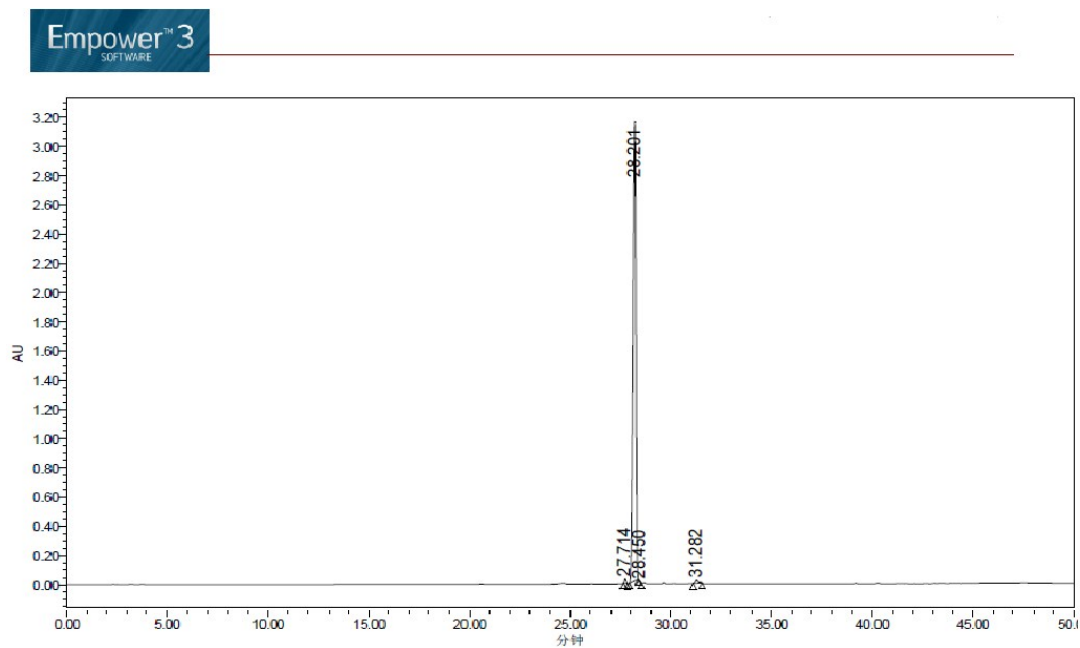

Supplement: c5ra11335k1.pdf [file c5ra11335k1.pdf]
